# Supplementary material
Source: Springer Nature journal article supplement (https://www.springermedizin.de/resource/supplementary/12974_2010_326_MOESM3_ESM.pdf/9601434)

**A**

mSOD1/RAG2+/+

mSOD1/RAG2-/-

early stage

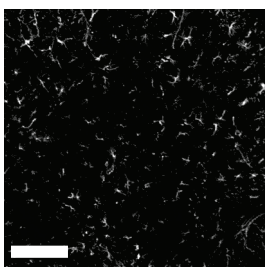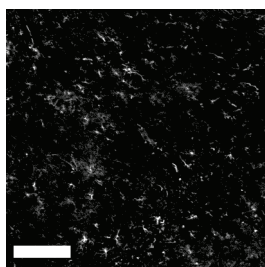

end stage

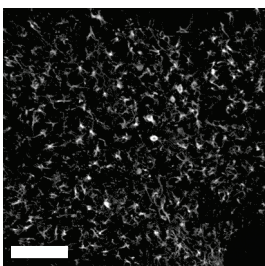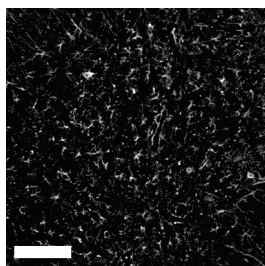**B**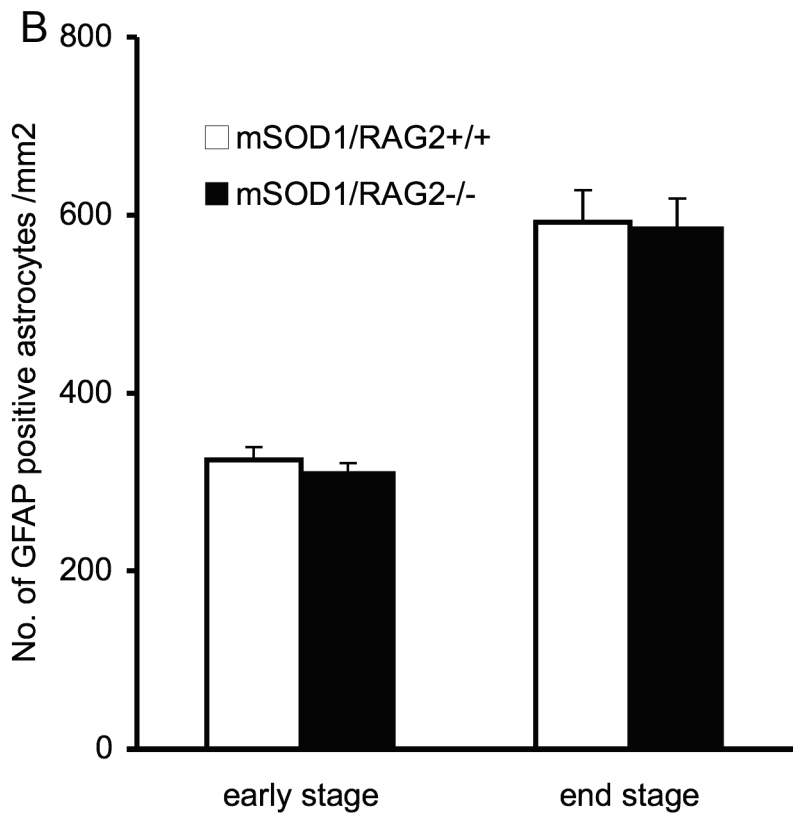

Supplement: MOESM3 [file 9601434]
